# Supplementary material
Source: Elsevier journal article supplement (https://www.sciencedirect.com/science/article/pii/S0212656720303292)
Supplement: mmc1 [file S0212656720303292:mmc1.docx]

**Supplemental Data 1.** The original 8-item Morisky Medication Adherence Scale (MMAS-8)*

| Item 1. Do you sometimes forget to take your diabetes medicine? |
| --- |
| Item 2. Over the past two weeks, were there any days when you did not take your diabetes medicine? |
| Item 3. Have you ever cut back or stopped taking your diabetes medicine without telling your doctor because you felt worse when you took it? |
| Item 4. When you travel or leave home, do you sometimes forget to bring along your diabetes medicine? |
| Item 5. Did you take your diabetes medicine yesterday? |
| Item 6. When you feel like your blood glucose is under control, do you sometimes stop taking your diabetes medicine? |
| Item 7. Taking medication every day is a real inconvenience for some people. Do you ever feel hassled about sticking to your diabetes treatment plan? |
| Item 8. How often do you have difficulty remembering to take all your diabetes medications? |

*The MMAS (8-item) content, name, and trademarks are protected by US copyright and trademark laws. Permission for use of the scale and its coding is required. A license agreement is available from Donald E. Morisky, ScD, ScM, MSPH, 14725 NE 20th St Bellevue, WA 98007, USA; dmorisky@gmail.com.
